# Supplementary material for: Spatiotemporal Variation and Predictors of Unsuppressed Viral Load among HIV-Positive Men and Women in Rural and Peri-Urban KwaZulu-Natal, South Africa
Source: MDPI journal article supplement (doi:10.3390/tropicalmed7090232), 2022-09-06
Supplement: s1 [file s1]

# Spatiotemporal Variation and Predictors of Unsuppressed Viral Load Among HIV Positive Men and Women in Rural and Peri-urban KwaZulu-Natal, South Africa

## Authors

Adenike O Soogun <sup>1,2,\*†</sup>, Ayesha BM Kharsany <sup>2,3,†</sup>, Temesgen Zewotir <sup>1</sup>, Delia North <sup>1</sup>, Ebenezer Ogunsakin <sup>4</sup> and Perry Rakgoale <sup>5</sup>

<sup>†</sup> Adenike O Soogun and Ayesha BM Kharsany are Joint first authors.

## Supplementary tables and figures

---

**Supplementary Table S1:** Characteristics of enrolled HIV positive men and women with viral load measurement in Vulindlela (rural) and Greater Edendale (peri-urban) area in uMgungundlovu district, KwaZulu-Natal province, South Africa.

**Supplementary Table S2:** Bivariate Survey logistics regression model examining predictors of unsuppressed viral load among HIV positive men and women in Vulindlela (rural) and Greater Edendale (peri-urban) area in uMgungundlovu district, KwaZulu-Natal Province, South Africa.

**Supplementary Table S2:** Values of model comparison measures, DIC.

**Supplementary Figure S1:** Potential predictors of HIV unsuppressed viral load.

**Supplementary Figure S2:** Prevalence of composite HIV viral load <400 copies/ml (suppressed) and ≥400 copies/ml (unsuppressed by gender and overall, among HIV positive men and women. **(B)** Progress towards 95-95-95 UNAIDS target, overall and by gender. First 95: Proportion of HIV positive individual who knew their status; Second 95: Proportion of HIV positive individuals who knew their status and self-reported to be on ART; Third 95: Proportion of HIV positive individuals who knew their status, self-reported to be on ART and had HIV viral load < 400 copies/ml.

**Table S1:** Characteristics of enrolled HIV positive men and women with viral load measurement in Vulindlela (rural) and Greater Edendale (peri-urban) area in the uMgungundlovu district, KwaZulu-Natal province, South Africa

| Characteristics                                          | Study sample (N= 7824)<br>n (%) |
|----------------------------------------------------------|---------------------------------|
| <b>Socio-demographic</b>                                 |                                 |
| <i>Median age [IQR]</i>                                  | 33 (27-39)                      |
| <i>Median household size [IQR]</i>                       | 4 (2-6)                         |
| <i>Study year</i>                                        |                                 |
| 2014 survey                                              | 3956 (50.6%)                    |
| 2015 survey                                              | 3868 (49.4%)                    |
| <i>Gender</i>                                            |                                 |
| 15-19                                                    | 337 (4.3%)                      |
| 20-24                                                    | 929 (12.1%)                     |
| 25-29                                                    | 1484 (18.7%)                    |
| 30-34                                                    | 1669 (21.3%)                    |
| 35-39                                                    | 1415 (19.1%)                    |
| 40-44                                                    | 1211 (15.1%)                    |
| 45-49                                                    | 779 (9.4%)                      |
| <i>Gender</i>                                            |                                 |
| Women                                                    | 5893 (64.5%)                    |
| Men                                                      | 1931 (35.5%)                    |
| <i>Marital status</i>                                    |                                 |
| Never married                                            | 6479 (83.8%)                    |
| Ever married                                             | 1345 (16.2%)                    |
| <i>Education level</i>                                   |                                 |
| Incomplete High School                                   | 4366 (57.6%)                    |
| Complete High School                                     | 3231 (40.3%)                    |
| No Schooling                                             | 227 (2.1%)                      |
| <i>Duration in the community</i>                         |                                 |
| Always                                                   | 5088 (66.8%)                    |
| Moved in less than 1 year ago                            | 266 (3.0%)                      |
| Moved in more than 1 year ago                            | 2470 (30.2%)                    |
| <i>Away from home for &gt;1 month</i>                    |                                 |
| Yes                                                      | 714 (9.3%)                      |
| No                                                       | 7110 (90.7%)                    |
| <i>Run out of money last 12 months <sup>A</sup></i>      |                                 |
| Yes                                                      | 2917 (38.9%)                    |
| No                                                       | 4893 (61.1%)                    |
| <i>Had meal cut last 12 months <sup>C</sup></i>          |                                 |
| Yes                                                      | 2598 (34.9%)                    |
| No                                                       | 5212 (65.1%)                    |
| <i>Accessing health care <sup>D</sup></i>                |                                 |
| Yes                                                      | 4395 (58.3%)                    |
| No                                                       | 3415 (41.7%)                    |
| <i>Monthly household income <sup>E</sup></i>             |                                 |
| >R2 500                                                  | 1836 (26.6%)                    |
| ≤R2 500                                                  | 5039 (63.0%)                    |
| No income                                                | 939 (10.4%)                     |
| <i>Place of residence</i>                                |                                 |
| Rural                                                    | 2606 (46.8%)                    |
| Peri-urban                                               | 5222 (53.2%)                    |
| <b>Behavioral</b>                                        |                                 |
| <i>Median number of sex partner last 12 months [IQR]</i> | 1 [1-2]                         |
| <i>Median number of lifetime sex partner [IQR]</i>       | 3 [2-5]                         |
| <i>Had sex in last 12 months</i>                         |                                 |
| Yes                                                      | 6306 (81.4%)                    |
| No                                                       | 1518 (18.6%)                    |
| <i>Forced sex first time</i>                             |                                 |

|                                                   |              |
|---------------------------------------------------|--------------|
| Yes                                               | 182 (2.1%)   |
| No                                                | 7552 (96.6%) |
| Don't remember                                    | 90(1.3%)     |
| <b>Alcohol consumption</b>                        |              |
| Yes                                               | 1928 (27.8%) |
| No                                                | 5896 (72.2%) |
| <b>HIV perception and knowledge</b>               |              |
| <i>Number of lifetime HIV test (median [IQR])</i> | 2 [1-3]      |
| <i>Ever tested for HIV</i>                        |              |
| Yes                                               | 6959 (89.6%) |
| No                                                | 865 (10.4%)  |
| <i>Perceived risk of contracting HIV</i>          |              |
| Likely to acquire HIV                             | 1476 (19.9%) |
| Not likely to acquire HIV                         | 1571 (19.8%) |
| Already infected                                  | 4777 (60.3%) |
| <b>Medical history</b>                            |              |
| <i>Ever tested for TB</i>                         |              |
| Yes                                               | 3862 (52.1%) |
| No                                                | 3962 (47.9%) |
| <i>Exposed to TB last 12 months</i>               |              |
| Yes                                               | 364 (5.0%)   |
| No                                                | 7442 (94.9%) |
| Don't want to disclose                            | 18 (0.1%)    |
| <i>Ever diagnosed with TB</i>                     |              |
| Yes                                               | 959 (14.1%)  |
| No                                                | 6865 (85.9%) |
| <i>On medication to prevent TB</i>                |              |
| Yes                                               | 808 (10.4%)  |
| No                                                | 7016 (89.6%) |
| <i>Ever had any STI symptoms</i>                  |              |
| Yes                                               | 306 (3.3%)   |
| No                                                | 7518 (96.7%) |
| <i>Ever diagnosed with STI</i>                    |              |
| Yes                                               | 743 (10.7%)  |
| No                                                | 7081 (89.3%) |
| <b>Biological</b>                                 |              |
| <i>On ART</i>                                     |              |
| Yes                                               | 3942 (50.8%) |
| No                                                | 3882 (49.2%) |
| <i>ARV dosage<sup>F</sup></i>                     |              |
| Fixed/single dose                                 | 3334 (87.2%) |
| Multiple                                          | 481 (12.7%)  |
| No response                                       | 127 (0.03%)  |
| <i>CD4 cell count<sup>G</sup></i>                 |              |
| < 350 cells/ $\mu$ L                              | 2097 (27.7%) |
| 350 – 499 cells/ $\mu$ L                          | 1697 (22.1%) |
| $\geq$ 500 cells/ $\mu$ L                         | 3990 (49.7%) |

Missing data for: <sup>A, B, C, D,</sup> =14 ; <sup>E</sup> 10 , <sup>F</sup> 127 , <sup>G</sup> 40 ; IQR = Interquartile range .

Missing data excluded from percentage calculation. ZAR= South African Rands (ZAR 15 ~US\$1)

Ever had any STI symptoms = any symptoms of abnormal vaginal discharge, burning or pain when passing urine, or presence of any genital ulcers/warts

**Table S2:** Bivariate Survey logistics regression model examining predictors of unsuppressed HIV viral load among HIV positive men and women in Vulindlela (rural) and Greater Edendale (peri-urban) area in the uMgungundlovu district, KwaZulu-Natal province, South Africa

| Characteristics                                              | Unadjusted OR (95% CI) | P-value   |
|--------------------------------------------------------------|------------------------|-----------|
| <b>Socio-demographic</b>                                     |                        |           |
| <b>Year (ref: 2014)</b>                                      |                        |           |
| 2015                                                         | 0.70 (0.63 – 0.78)     | <0.0001*  |
| <b>Gender (ref: female)</b>                                  |                        |           |
| Male                                                         | 1.66 (1.48 - 1.85)     | <0.0001*  |
| <b>Age group (ref: 15-19)</b>                                |                        |           |
| 20-24                                                        | 1.16 (0.85 - 1.59)     | 0.352     |
| 25-29                                                        | 0.67 (0.51 - 0.89)     | 0.005*    |
| 30-34                                                        | 0.46 (0.35 -0.60)      | <0.0001*  |
| 35-39                                                        | 0.31 (0.23 -0.41)      | <0.0001*  |
| 40-44                                                        | 0.30 (0.23 -0.41)      | <0.0001*  |
| 45-49                                                        | 0.25 (0.18 - 0.34)     | <0.0001*  |
| <b>Education level (Ref: Complete high schooling)</b>        |                        |           |
| Incomplete High schooling                                    | 0.81 (0.72 - 0.90)     | <0.0001*  |
| <b>Away from home more than 1 month (Ref: No)</b>            |                        |           |
| Yes                                                          | 1.41 (1.17 - 1.70)     | <0.0001*  |
| <b>Community duration (ref: Always)</b>                      |                        |           |
| Moved here less than 1 year ago                              | 1.07 (1.43 -0.66)      | 0.664     |
| Moved here more than 1 year ago                              | 0.77 (0.69 - 0.87)     | <0.0001*  |
| <b>Marital Status (ref: Ever married)</b>                    |                        |           |
| Never married                                                | 1.63 (1.38 - 1.92)     | <0.0001*  |
| <b>Enumeration area (Ref: Rural)</b>                         |                        |           |
| Peri-urban                                                   | 1.08 (0.96 - 1.23)     | 0.206     |
| <b>Ran out of money last 12 months (Ref: No)</b>             |                        |           |
| Yes                                                          | 0.88 (0.79 - 0.98)     | 0.026*    |
| <b>Had meal cut last 12 months (Ref: No)</b>                 |                        |           |
| Yes                                                          | 0.87 (0.78 - 0.98)     | 0.024*    |
| <b>Accessing health care (Ref: Yes)</b>                      |                        |           |
| No                                                           | 1.66 (1.48 - 1.86)     | <0.0001*  |
| <b>Income (Ref: &gt;R2500)</b>                               |                        |           |
| ≤ R2500                                                      | 1.08 (0.96 - 1.21)     | 0.190     |
| No income                                                    | 1.25 (1.04 - 1.49)     | 0.018     |
| <b>Sexual behavioral</b>                                     |                        |           |
| <b>Had sex in last 12 months (Ref: Yes)</b>                  |                        |           |
| No                                                           | 0.89 (0.78 - 1.01)     | 0.077     |
| <b>Number of sex partner last 12 months (Ref: 0 partner)</b> |                        |           |
| 1 partner                                                    | 1.01 (0.89 - 1.15)     | 0.838     |
| 2 or More partners                                           | 1.56 (1.26 -1.92)      | <0.0001*  |
| <b>Number of lifetime sex partner (Ref: 0-1 partner)</b>     |                        |           |
| 2 or more partners                                           | 0.75 (0.64 - 0.89)     | < 0.0001* |
| <b>Forced sex first time (Ref: No)</b>                       |                        |           |
| Yes                                                          | 0.89 (0.64 - 1.23)     | 0.471     |
| Don't remember                                               | 1.53 (1.23 - 1.91)     | <0.0001*  |
| <b>Alcohol consumption (Ref: No)</b>                         |                        |           |
| Yes                                                          | 1.78 (1.58 - 2.00)     | <0.0001*  |
| <b>HIV perception and testing knowledge</b>                  |                        |           |

|                                                                  |                       |           |
|------------------------------------------------------------------|-----------------------|-----------|
| <b>Ever tested for HIV (Ref: Yes)</b>                            |                       |           |
| No                                                               | 3.54 (2.84 - 4.42)    | <0.0001*  |
| <b>Number of lifetime HIV test (Ref: 2 or more times)</b>        |                       |           |
| 1 time                                                           | 0.84 (0.74 - 0.95)    | 0.005*    |
| Never                                                            | 3.36 (2.68 - 4.20)    | <0.0001*  |
| <b>Knowledge of HIV status (Ref: Positive)</b>                   |                       |           |
| Negative                                                         | 6.28 (5.52 - 7.15)    | <0.0001*  |
| <b>Perceived risk of contracting HIV (Ref: Already infected)</b> |                       |           |
| Likely to Acquire HIV                                            | 5.27 (4.51 - 6.16)    | <0.0001*  |
| Not likely to Acquire HIV                                        | 6.36 (5.45 - 7.43)    | <0.0001*  |
| <b>Medical history</b>                                           |                       |           |
| <b>Ever tested for TB (Ref: No)</b>                              |                       |           |
| Yes                                                              | 0.34 (0.31 - 0.38)    | <0.0001*  |
| <b>Exposed to TB last 12 months (Ref: No)</b>                    |                       |           |
| Yes                                                              | 0.78 (0.61 - 1.00)    | 0.053*    |
| <b>Ever Diagnosed with TB (Ref: No)</b>                          |                       |           |
| Yes                                                              | 0.43 (0.36 - 0.51)    | <0.0001*  |
| <b>On TB medication (Ref: No)</b>                                |                       |           |
| Yes                                                              | 0.30 (0.24 - 0.36)    | <0.0001*  |
| <b>Ever had any STI symptoms (Ref: No)</b>                       |                       |           |
| Yes                                                              | 0.92 (0.71 - 1.20)    | 0.533     |
| <b>Ever diagnosed with STI (Ref: No)</b>                         |                       |           |
| Yes                                                              | 1.18 (0.99 - 1.42)    | 0.070     |
| <b>Biological</b>                                                |                       |           |
| <b>On ARV (Ref: Yes)</b>                                         |                       |           |
| No                                                               | 16.57 (14.43 - 19.02) | < 0.0001* |
| <b>ARV dosage (Ref: Fixed dosage)</b>                            |                       |           |
| Multiple dosage                                                  | 2.72 (2.10 - 3.52)    | <0.0001*  |
| <b>CD4 count category (Ref: &lt;350 cells/<math>\mu</math>L)</b> |                       |           |
| 350-499 cells/ $\mu$ L                                           | 0.40 (0.34 - 0.47)    | <0.0001*  |
| $\geq$ 500 cells/ $\mu$ L                                        | 0.21 (0.18 - 0.24)    | <0.0001*  |

\*Significant at 5% level of significance. IQR = Interquartile range. OR= Odds Ratio. CI= Confidence Interval  
ZAR= South African Rands (ZAR 15 ~US\$1). Ever had any STI symptoms = any symptoms of abnormal vaginal discharge burning or pain when passing urine, or presence of any genital ulcers/warts

**Table S3.** Values of model comparison measures, DIC.

| Parameters | GAM     | Structured | Unstructured |
|------------|---------|------------|--------------|
| DIC        | 6410.15 | 5903.19    | 5894.51      |
| pD         | 63.93   | 77.69      | 81.45        |

DIC: Deviance Information Criteria. pD: effective numbers of parameters.

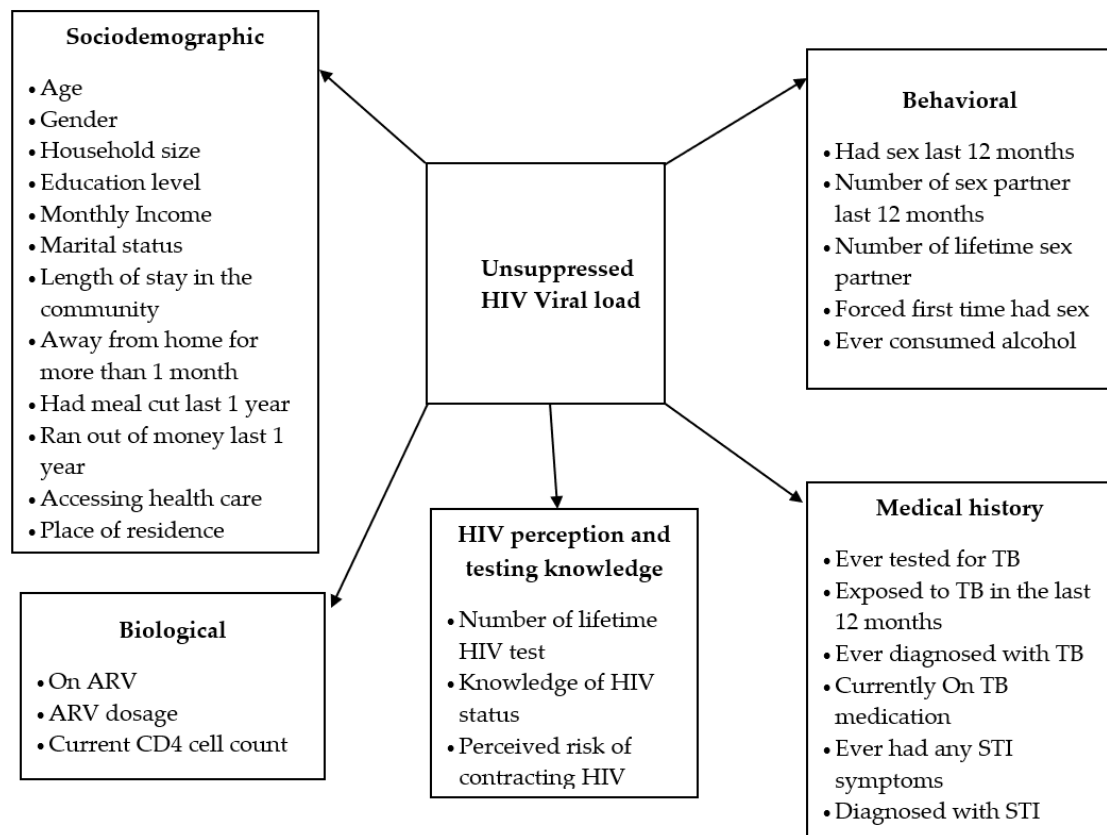

**Figure S1:** Potential predictors of unsuppressed HIV viral load

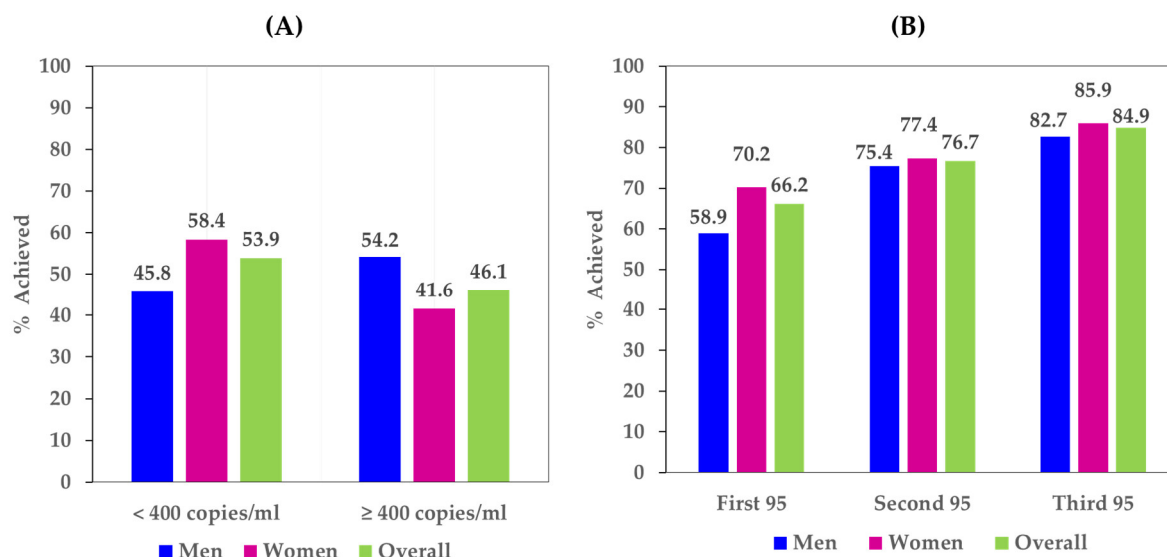

**Figure S2: (A)** Prevalence of composite HIV viral load <400 copies/ml (suppressed) and ≥400 copies/ml (unsuppressed) by gender and overall, among HIV positive men and women. **(B)** Progress towards UNAIDS 95-95-95 targets by gender and overall. First 95: Proportion of HIV positive individuals who knew their status. Second 95: Proportion of HIV positive individuals who knew their status and self-reported to be on ART; Third 95: Proportion of HIV positive individuals who knew their status, self-reported to be on ART and had HIV viral load < 400 copies/ml.
